# Supplementary material for: Continuous hydrothermal synthesis of 3,4-dihydroxyhydrocinnamic acid-modified magnetite nanoparticles with stealth-functionality against immunological response
Source: Royal Society of Chemistry journal article supplement (doi:10.1039/c2jm30325f), 2012-01-01
Supplement: c2jm30325f.pdf [file c2jm30325f.pdf]

Supporting information

Continuous Hydrothermal Synthesis of 3,4-Dihydroxyhydroxycinnamic Acid-Modified Magnetite Nanoparticles with Stealth-Functionality against Immunological Response

*Takanari Togashi,<sup>1</sup> Seiichi Takami,<sup>2</sup> Kazuyoshi Kawakami,<sup>3</sup> Hideki Yamamoto,<sup>3</sup> Takashi Naka,<sup>4</sup>  
Koichi Sato,<sup>4</sup> Keietsu Abe,<sup>5</sup> Tadafumi Adschiri<sup>1</sup>*

*1. Advanced Institute for Material Research (WPI-AIMR), Tohoku University 2-1-1, Katahira, Aoba-ku, Sendai 980-8577, Japan,*

*2. Institute for Multidisciplinary for Advanced Material, Tohoku University, 2-1-1 Katahira, Aoba-ku, Sendai, Miyagi, 980-8577, Japan*

*3. Innovative Materials Engineering Laboratory, National Institute for Material Science, Sengen 1-2-1, Tsukuba, Ibaraki, 305-0047, Japan,*

*4. Department of Medical Microbiology and Immunology, Tohoku University, 2-1 Seiryō-cho, Aoba-ku, Sendai, Miyagi, 985-8575, Japan*

*5. New Industry Creation Hatchery Centre, Tohoku University, 6-6-10 Aoba, Aoba-ku, Sendai, Miyagi, 980-8579, Japan*

### Stability of dispersed solutions of the synthesized $\text{Fe}_3\text{O}_4$ nanoparticles

Fig. S1 shows photographs of 1 mg/ml of synthesized  $\text{Fe}_3\text{O}_4$  nanoparticles dispersed in water and in 0.9% NaCl aqueous solution (**Fig. S1**). Both solutions were well dispersed. Precipitation and aggregation could not be confirmed after one month.

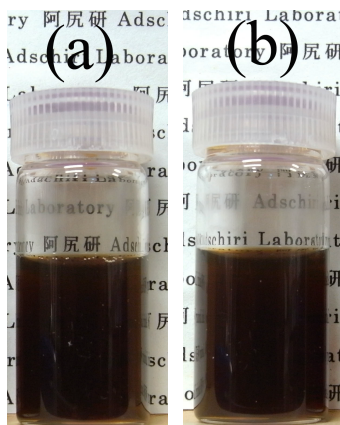

**Figure S1.** Photographs of magnetite nanoparticles synthesized at 300 °C: (a) Dispersed in water solution; (b) Dispersed in 0.9% NaCl solution

## Evaluation coverage of DHCA on the Fe<sub>3</sub>O<sub>4</sub> nanoparticle

The amount of DHCA molecules attached on Fe<sub>3</sub>O<sub>4</sub> was evaluated with thermogravimetric measurement (**Fig. S2**) that were performed on a TGDTA T8120 (Rigaku, Japan). All measurements were taken under a constant argon flow of 30 mL/min. The temperature was first kept for 30 min at 105 °C to remove most of the water and then increased to 800 °C at a rate of 10 °C/min. The initial weight of each sample was about 5 mg. All the reported TGA curves were normalized with respect to the weight at 105 °C to ensure that only the solid fraction was measured.

Fig. S2 shows the thermogravimetric measurement data of the synthesized Fe<sub>3</sub>O<sub>4</sub> nanoparticles. Significant decrease of the weight was observed for 280 °C, which is considered as desorption and decomposition of DHCA, according to previous report.<sup>[1]</sup> In addition, the coverage of DHCA on the all synthesized Fe<sub>3</sub>O<sub>4</sub> was about 4 molecules/nm<sup>2</sup> and was not change drastically with changing the reaction temperature (Table S1).

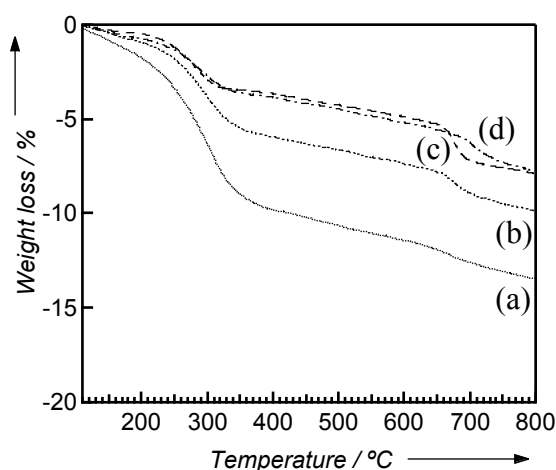

**Figure S2.** Thermogravimetric measurement of synthesized Fe<sub>3</sub>O<sub>4</sub> at various temperatures: (a) 230 °C; (b) 260 °C; (c) 300 °C; (d) 360 °C

**Table S1.** Evaluated coverage of DHCA synthesized Fe<sub>3</sub>O<sub>4</sub> at various temperatures.

| Temperature (°C) | Diameter (nm) | Average mass contribution of DHCA (%) | Surface area (nm <sup>2</sup> /particle) | Coverage ratio (DHCA/nm <sup>2</sup> ) |
|------------------|---------------|---------------------------------------|------------------------------------------|----------------------------------------|
| 230              | 10.5          | 13.4                                  | 346                                      | 4.3                                    |
| 260              | 13.2          | 9.8                                   | 547                                      | 4.1                                    |
| 300              | 16.2          | 7.9                                   | 824                                      | 3.9                                    |
| 350              | 17.6          | 7.7                                   | 972                                      | 4.2                                    |

[1]A. L. Petrou, M. V. Koromantzou, *Transition. Met. Chem.*, **1991**, 16, 48-52
